# Supplementary material for: Exploring the fabrication and transfer mechanism of metallic nanostructures on carbon nanomembranes via focused electron beam induced processing
Source: publisher site journal article supplement (doi:10.3762/bjnano.12.26), 2021-04-07
Supplement: Additional file 1 [file 2190-4286-12-26-S1.pdf]

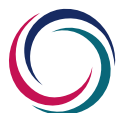

## Supporting Information

for

### **Exploring the fabrication and transfer mechanism of metallic nanostructures on carbon nanomembranes via focused electron beam induced processing**

Christian Preischl, Linh Hoang Le, Elif Bilgilisoy, Armin Götzhäuser  
and Hubertus Marbach

*Beilstein J. Nanotechnol.* **2021**, *12*, 319–329. doi:10.3762/bjnano.12.26

## Additional experimental data

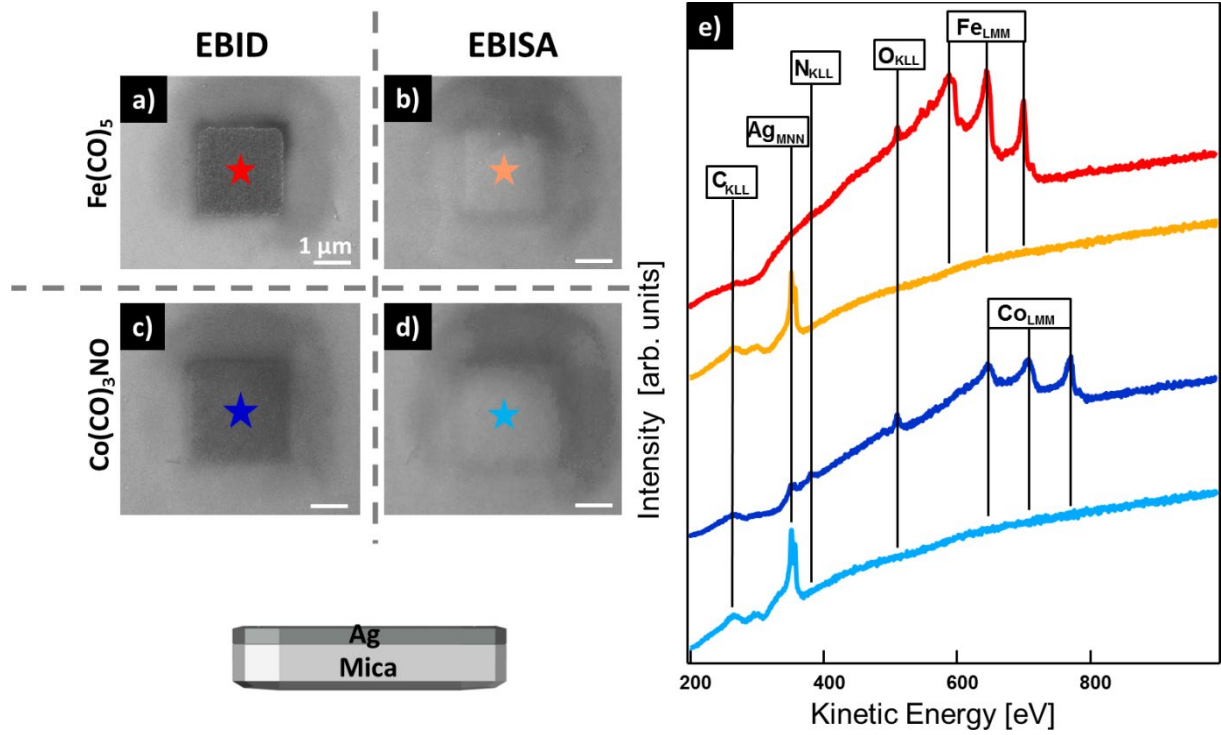

**Figure S1:** Results of FEBIP experiments followed by autocatalytic growth on Ag(111)/mica. All structures were written with  $E_{\text{beam}} = 15 \text{ kV}$  and  $I_{\text{beam}} = 3 \text{ nA}$ . (a) SEM image of a  $2 \times 2 \mu\text{m}^2$  deposit fabricated via EBID + AG with  $\text{Fe}(\text{CO})_5$  (4.7 C/cm<sup>2</sup> and  $t_{\text{AG}} = 2 \text{ h } 26 \text{ min}$ ). (b) SEM image of a  $2 \times 2 \mu\text{m}^2$  deposit fabricated via EBISA + AG with  $\text{Fe}(\text{CO})_5$  (10.1 C/cm<sup>2</sup> and  $t_{\text{AG}} = 2 \text{ h } 41 \text{ min}$ ). (c) SEM image of a  $2 \times 2 \mu\text{m}^2$  deposit fabricated via EBID + AG with  $\text{Co}(\text{CO})_3\text{NO}$  (4.7 C/cm<sup>2</sup> and  $t_{\text{AG}} = 2 \text{ h } 24 \text{ min}$ ). (d) SEM image of a  $2 \times 2 \mu\text{m}^2$  deposit fabricated via EBISA + AG with  $\text{Co}(\text{CO})_3\text{NO}$  (10.1 C/cm<sup>2</sup> and  $t_{\text{AG}} = 2 \text{ h } 47 \text{ min}$ ). (e) Local AE spectra recorded at the positions indicated with the correspondingly colored stars.

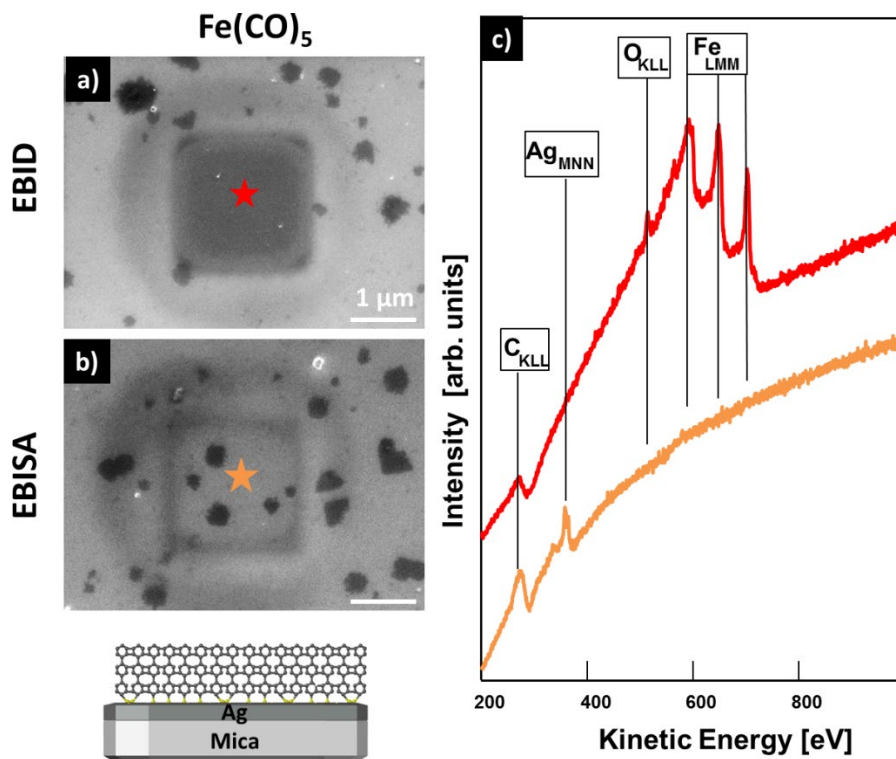

**Figure S2:** Results of FEBIP experiments followed by autocatalytic growth on a CNM on Ag(111)/mica. All structures were written with  $E_{\text{beam}} = 15 \text{ kV}$  and  $I_{\text{beam}} = 3 \text{ nA}$ . (a) SEM image of a  $2 \times 2 \mu\text{m}^2$  deposit fabricated via EBID + AG with  $\text{Fe}(\text{CO})_5$  ( $7.8 \text{ C/cm}^2$  and  $t_{\text{AG}} = 3 \text{ h } 38 \text{ min}$ ). (b) SEM image of a  $2 \times 2 \mu\text{m}^2$  deposit fabricated via EBISA + AG with  $\text{Fe}(\text{CO})_5$  ( $7.8 \text{ C/cm}^2$  and  $t_{\text{AG}} = 4 \text{ h } 2 \text{ min}$ ). (c) Local AE spectra recorded at the positions indicated with the correspondingly colored stars.

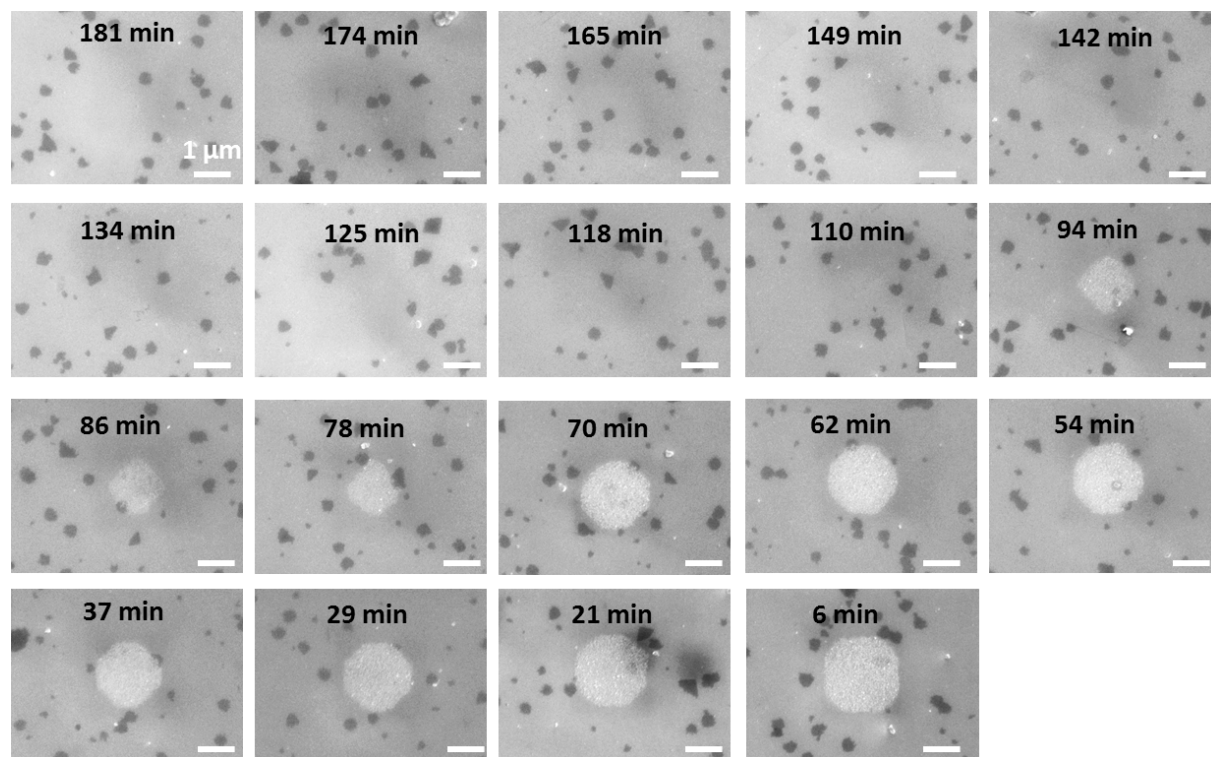

**Figure S3:** Results of time-dependent EBISA experiments followed by autocatalytic growth on a TPT SAM on Ag(111)/mica. All structures were written with  $E_{\text{beam}} = 15$  kV,  $I_{\text{beam}} = 3$  nA, and the same  $t_{\text{AG}} = 3$  h 29 min. SEM images of  $2 \times 2 \mu\text{m}^2$  deposits fabricated via EBISA + AG with  $\text{Fe}(\text{CO})_5$  (electron dose:  $1.01 \text{ C}/\text{cm}^2$ ). The waiting time between electron irradiation and precursor dosage is indicated for each structure.

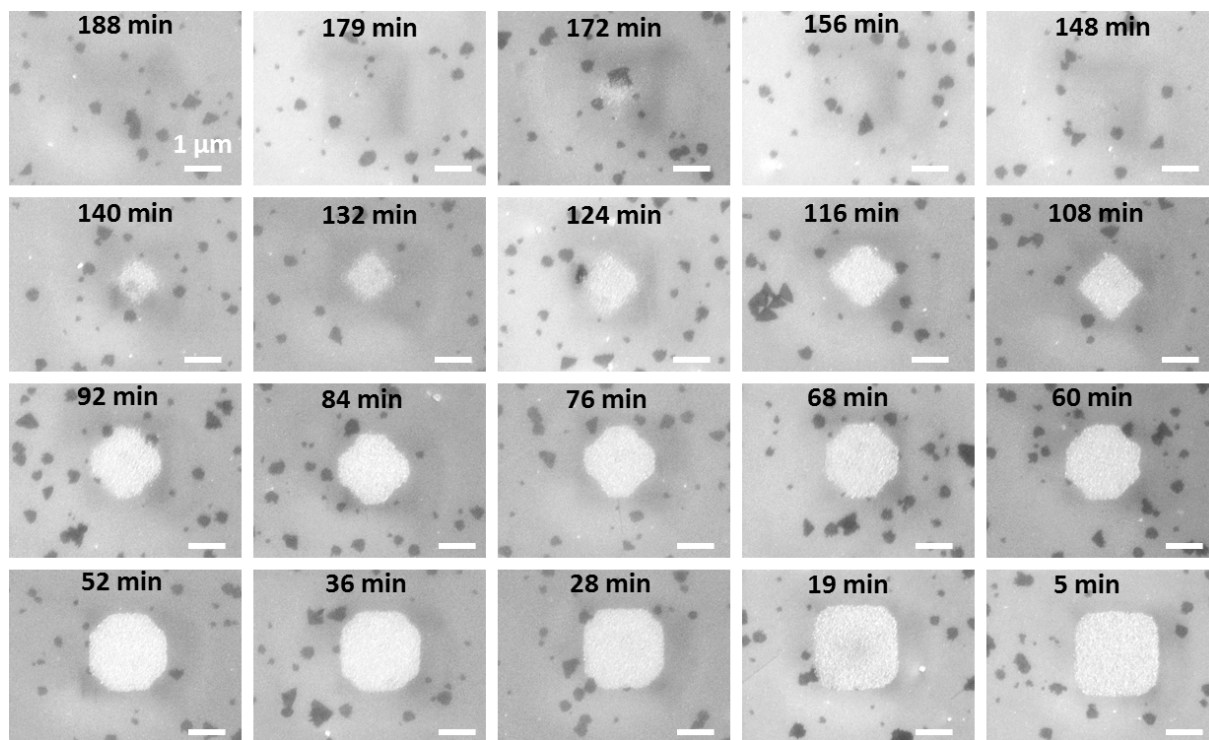

**Figure S4:** Results of time-dependent EBISA experiments followed by autocatalytic growth on a TPT SAM on Ag(111)/mica. All structures were written with  $E_{\text{beam}} = 15$  kV,  $I_{\text{beam}} = 3$  nA, and the same  $t_{\text{AG}} = 3$  h 29 min; SEM images of  $2 \times 2 \mu\text{m}^2$  deposits fabricated via EBISA + AG with  $\text{Fe}(\text{CO})_5$  (electron dose:  $3.12 \text{ C/cm}^2$ ). The waiting time between electron irradiation and precursor dosage is indicated for each structure.

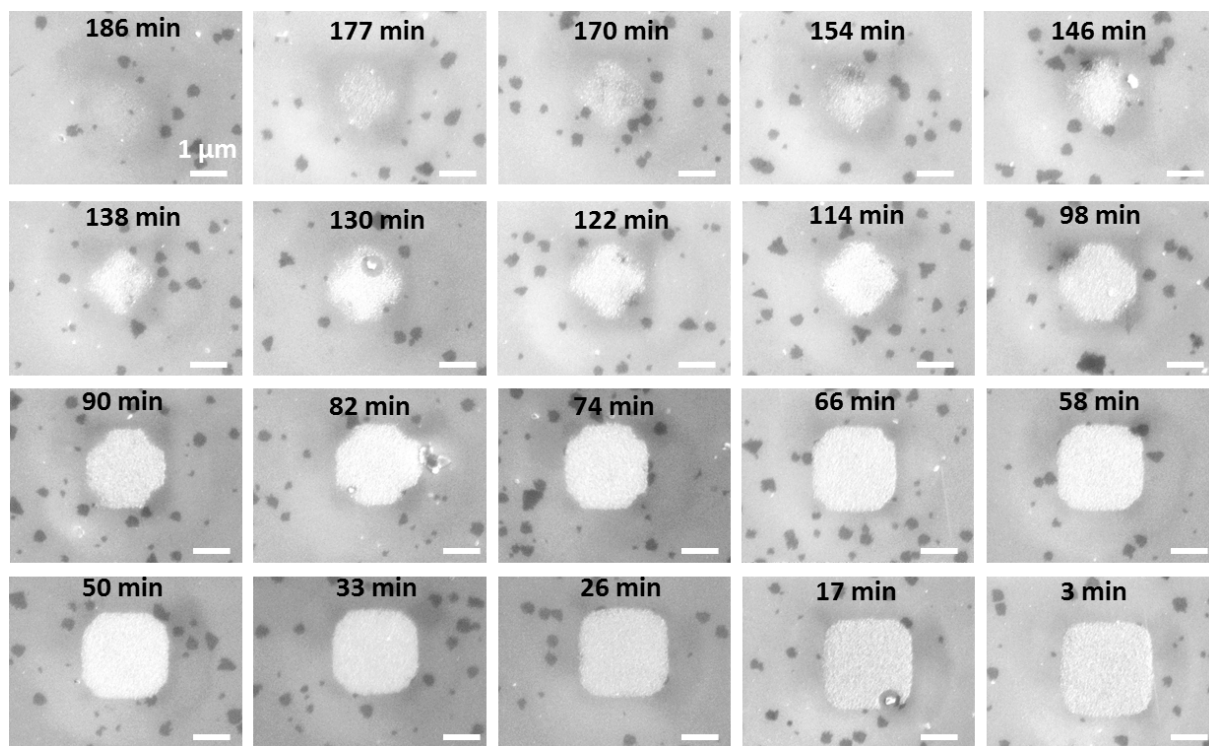

**Figure S5:** Results of time-dependent EBISA experiments followed by autocatalytic growth on a TPT SAM on Ag(111)/mica. All structures were written with  $E_{\text{beam}} = 15$  kV,  $I_{\text{beam}} = 3$  nA, and the same  $t_{\text{AG}} = 3$  h 29 min. SEM images of  $2 \times 2 \mu\text{m}^2$  deposits fabricated via EBISA + AG with  $\text{Fe}(\text{CO})_5$  (electron dose:  $6.08 \text{ C/cm}^2$ ). The waiting time between electron irradiation and precursor dosage is indicated for each structure.

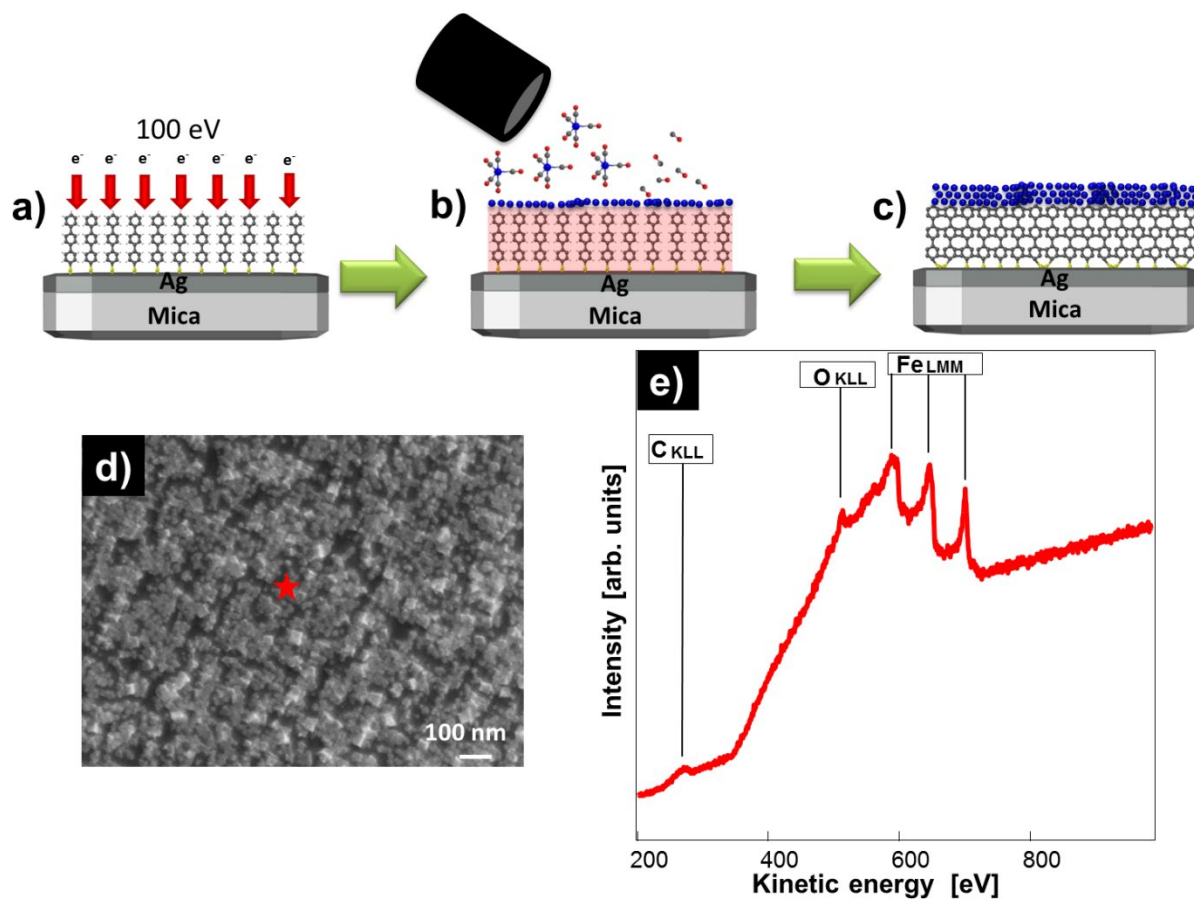

**Figure S6:** EBISA-like process with low-energy electrons. (a) Irradiation of a TPT SAM on Ag(111)/mica (100 eV; 120 mC/cm<sup>2</sup>) by a flood gun. (b) Dosage of the Fe(CO)<sub>5</sub> precursor for 4 h. The active species in the SAM are indicated by the red rectangle. (c) Cross-linked CNM with Fe nanocrystals on top. (d) SEM image of the cross-linked CNM with Fe nanocrystals on top. (e) Local AE spectrum recorded at the position indicated by the colored star.

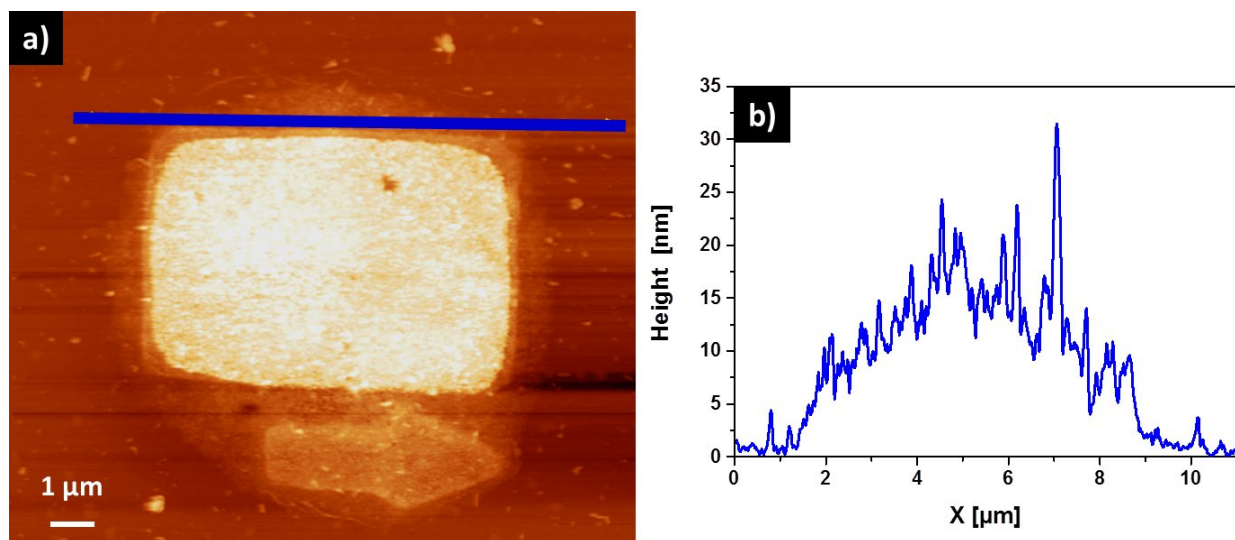

**Figure S7:** (a) AFM image of the Fe structure shown in Figure 4c of the main manuscript. (b) Height profile of the bright circular feature around the Fe structure

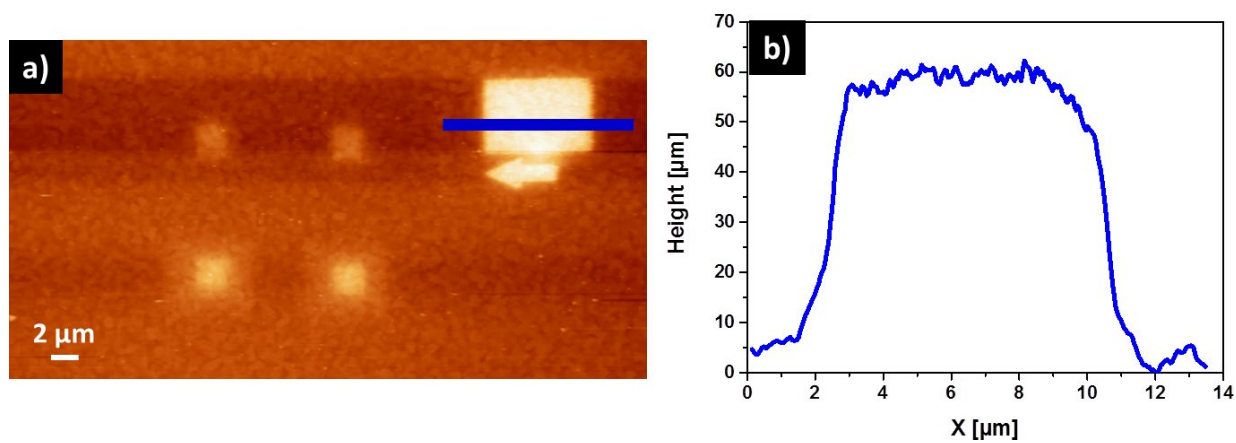

**Figure S8:** (a) AFM image of five different cobalt oxide structures before the transfer process. (b) Height profile of the large marker structure
